# Supplementary material
Source: publisher site journal article supplement (https://www.spandidos-publications.com/240/downloadSupplementary)
Supplement: Supplementary file 1 [file downloadSupplementary]

Figure S1. Uni- and multivariate survival analysis of prognostic factors influencing cancer-specific survival in localized and distant clear cell renal cell carcinomas represented as forest plots, where the following comparisons have been applied: (1) G3 vs. G1/G2; (2) pT3/pT4 vs. pT1/pT2; (3) pN1/pN2 vs. N0/pN0; (4)  $\geq 1$  vs. 0; (5)  $>65$  vs.  $\leq 65\%$ ; (6) female vs. male; and (7)  $>60\%$  vs.  $\leq 60\%$ . \* $P < 0.05$  and \*\*\* $P < 0.001$ . ECOG, Eastern Cooperative Oncology Group; CI, confidence interval.

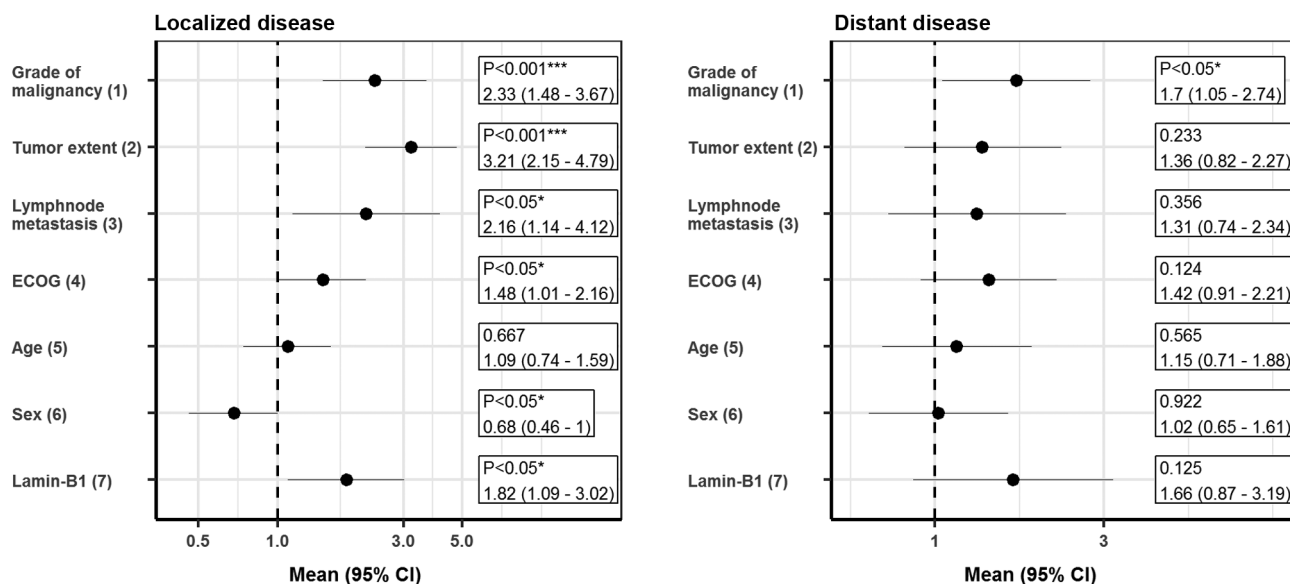

Figure S2. Analysis of The Cancer Genome Atlas dataset. Associations between the mRNA expression of LMNB1 and survival times are represented as Kaplan-Meier plots. LMNB1, Lamin-B1.

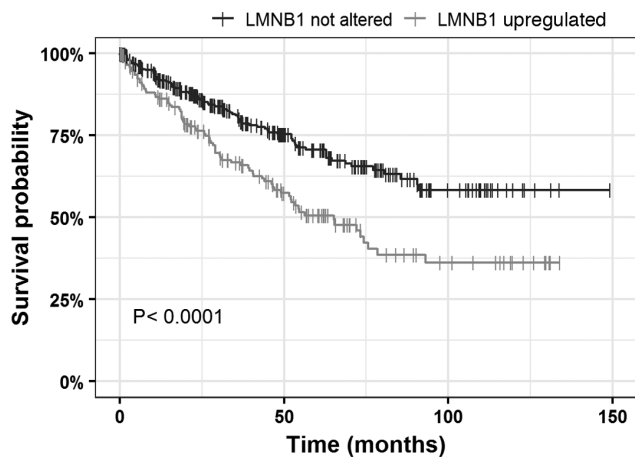

Figure S3. Comparison of the proliferation rate of clear cell renal cell carcinoma in relation to high vs. low Lamin-B1 expression represented as violin plots.

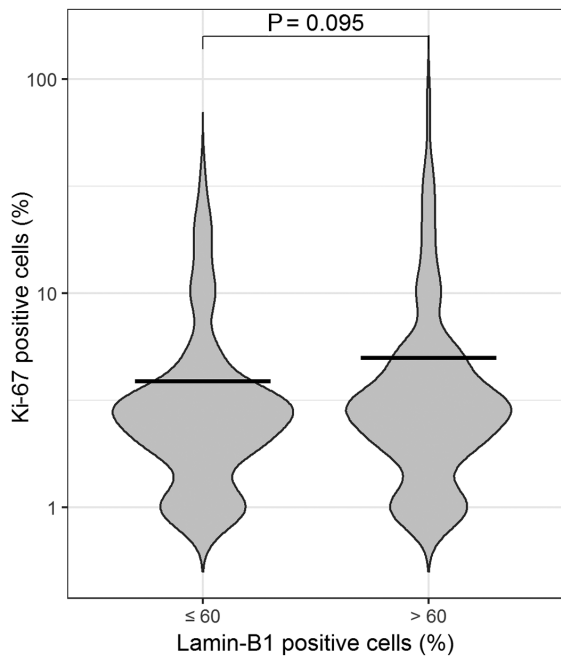

Table SI. Clinical and pathological features of the study population grouped by Lamin-B1 expression.

| Feature                     | Lamin-B1 expression, n (%) |              |
|-----------------------------|----------------------------|--------------|
|                             | ≤60% (n=119)               | >60% (n=503) |
| Fuhrman grade               |                            |              |
| 1                           | 33 (27.7)                  | 137 (27.2)   |
| 2                           | 61 (51.3)                  | 284 (56.5)   |
| 3                           | 25 (21.0)                  | 82 (16.3)    |
| Tumor extent                |                            |              |
| 1                           | 67 (56.3)                  | 267 (53.1)   |
| 2                           | 9 (7.6)                    | 40 (8.0)     |
| 3                           | 40 (33.6)                  | 177 (35.2)   |
| 4                           | 3 (2.5)                    | 19 (3.8)     |
| Local lymph node metastasis |                            |              |
| No                          | 115 (96.6)                 | 473 (94.0)   |
| Yes                         | 4 (3.4)                    | 30 (6.0)     |
| Distant metastasis          |                            |              |
| No                          | 104 (87.4)                 | 417 (82.9)   |
| Yes                         | 15 (12.6)                  | 86 (17.1)    |
| Sex                         |                            |              |
| Female                      | 53 (44.5)                  | 196 (39.0)   |
| Male                        | 66 (55.5)                  | 307 (61.0)   |
| Age at surgery, years       |                            |              |
| ≤65                         | 76 (63.9)                  | 277 (55.1)   |
| >65                         | 43 (36.1)                  | 226 (44.9)   |
| ECOG                        |                            |              |
| 0                           | 72 (60.5)                  | 309 (61.4)   |
| >0                          | 47 (39.5)                  | 194 (38.6)   |

Data are presented as n (%). ECOG, Eastern Cooperative Oncology Group.
